1  
2  
3  
4  
5  
6  
7  
8  
9  
10  
11  
12  
13  
14  
15  
16  
17  
18  
19  
20  
21

**A machine learning model that emulates experts' decision making in vancomycin initial dose planning**

Tetsuo Matsuzaki, Yoshiaki Kato, Hiroyuki Mizoguchi, and Kiyofumi Yamada\*

*Hospital Pharmacy, Nagoya University Graduate School of Medicine, Nagoya, Aichi, 466-8560, Japan*

Running title: A prediction model for vancomycin dosing

\* Corresponding author: Kiyofumi Yamada

*Hospital Pharmacy, Nagoya University Graduate School of Medicine, Nagoya, Aichi, 466-8560, Japan*

E-mail: [kyamada@med.nagoya-u.ac.jp](mailto:kyamada@med.nagoya-u.ac.jp)

Phone: +81-052-744-2674

Fax: +81-052-744-2979

22 **Abstract**

23

24 Vancomycin is a glycopeptide antibiotic that has been used primarily in the treatment of  
25 methicillin-resistant *Staphylococcus aureus* infections. To enhance its clinical effectiveness  
26 and prevent nephrotoxicity, therapeutic drug monitoring (TDM) of trough concentrations is  
27 recommended.

28 Initial vancomycin dosing regimens are determined based on patient characteristics such as  
29 age, body weight, and renal function, and dosing strategies to achieve therapeutic  
30 concentration windows at initial TDM have been extensively studied. Although numerous  
31 dosing nomograms for specific populations have been developed, no comprehensive  
32 strategy exists for individually tailoring initial dosing regimens; therefore, decision making  
33 regarding initial dosing largely depends on each clinician's experience and expertise.

34 In this study, we applied a machine-learning (ML) approach to integrate clinician  
35 knowledge into a predictive model for initial vancomycin dosing. A dataset of vancomycin  
36 initial dose plans defined by pharmacists experienced in vancomycin TDM (i.e., experts)  
37 was used to build the ML model. The target trough concentration was attained at  
38 comparable rates with the model- and expert-recommended dosing regimens, suggesting

39 that the ML model successfully incorporated the experts' knowledge. The predictive model  
40 developed here will contribute to improved decision making for initial vancomycin dosing  
41 and early attainment of therapeutic windows.

42

43 Keywords: Machine learning, Vancomycin, Initial dosing regimen, TDM

44

45

46 **Introduction**

47

48 Vancomycin is a glycopeptide antibiotic that has been in clinical use for more than 50 years,  
49 primarily for the treatment of methicillin-resistant *Staphylococcus aureus* (MRSA)  
50 infections (1). To maximize its clinical effectiveness and avoid nephrotoxicity, therapeutic  
51 drug monitoring (TDM) is recommended. The ratio of the vancomycin area under the  
52 concentration-time curve (AUC) to the minimum inhibitory concentration (MIC),  
53 AUC/MIC, is a primary predictor of vancomycin effectiveness. However, since it is  
54 challenging to determine the AUC due to the need to obtain multiple serum vancomycin  
55 concentrations, it is recommended to monitor the trough serum concentration, which is  
56 considered to be the most accurate and practical surrogate marker for the AUC (1). The  
57 trough concentration of vancomycin should be above 10 mg/L and below 20 mg/L to avoid  
58 development of resistance and nephrotoxicity, respectively (1–3). Thus, the therapeutic  
59 range for vancomycin trough levels is 10–20 mg/L, while several guidelines have  
60 recommended vancomycin trough levels of 15–20 mg/L for serious invasive MRSA  
61 infections such as sepsis (4, 5).

62 Initial vancomycin dosing consists of a single loading dose followed by a series of  
63 maintenance doses; the usual loading dose and maintenance dose are 25–30 mg/kg and 15–  
64 20 mg/kg, respectively (4). Loading and maintenance doses are adjusted for patient  
65 characteristics such as age, gender, body weight (BW), and renal function. In clinical  
66 practice, initial dosing is calculated using population pharmacokinetic parameters, and  
67 numerous population pharmacokinetic studies of vancomycin have been conducted to  
68 develop nomograms designed to achieve therapeutic trough concentrations at initial TDM  
69 (6–8). However, because these nomograms were constructed and validated within specific  
70 populations, their robustness to population change is limited. To date, there is no  
71 comprehensive strategy for individually optimized initial dosing, and vancomycin dosing  
72 decisions are often made based on clinicians’ experience and expertise (hereafter, prior  
73 knowledge) (7, 9, 10). In a recent survey in the United States and Canada, many healthcare  
74 institutions indicated that institutional-level credentialing or training was important to  
75 achieve appropriate vancomycin TDM (11). Indeed, several studies demonstrated that  
76 initial dose planning by pharmacists engaged in vancomycin TDM could lead to higher  
77 target attainment rates, emphasizing the importance of prior knowledge when conducting  
78 vancomycin dose planning (12, 13).

79 Machine learning (ML) algorithms promote the discovery of new techniques and improve  
80 decision making on specific questions involving abundant and multi-dimensional data, and  
81 they have emerged as a promising approach for medical research and clinical care.  
82 Advances in ML have facilitated the discovery of new biomarkers and mutations related to  
83 prognosis, and also the development of automated diagnosis tools (14). Recently, ML  
84 approaches have also been used in the field of TDM. Imai and colleagues utilized an ML  
85 approach to build a nomogram for initial vancomycin dosing using a dataset of patients  
86 treated with vancomycin (6). A study by Huang et al. applied variable engineering and ML  
87 methods that enabled integration of high-dimensional data to build a predictive model for  
88 maintenance dosing (15).

89 Given the importance of prior knowledge in vancomycin dose planning, here we sought to  
90 integrate such knowledge into an ML model for initial vancomycin dosing. Toward this  
91 goal, we used a dataset of vancomycin initial dosing regimens that were defined by  
92 pharmacists experienced in TDM (hereafter, TDM experts). This straightforward approach  
93 yielded a predictive model that reproduces regimens defined by TDM experts. Notably, a  
94 therapeutic window was achieved at a similar rate using ML- and expert-recommended  
95 dosing regimens, whereas a previously developed ML model failed to predict dosing

96 regimens that attained a therapeutic window (6).

97 **Materials and methods**

98

99 **Study subjects**

100

101 This was a single-center, retrospective, observational study of hospitalized patients who  
102 received intravenous vancomycin from May 2017 to May 2021 at Nagoya University  
103 Hospital. TDM experts were defined as pharmacists who were either (i) engaged in  
104 vancomycin TDM or (ii) capable of conducting vancomycin initial dose planning with  
105 similar success as the pharmacists defined in (i). Patients who commenced vancomycin  
106 treatment with TDM expert–recommended dosing during the study period were included.  
107 The exclusion criteria were as follows: under 18 years of age; undergoing peritoneal  
108 dialysis or hemodialysis (including continuous hemodiafiltration); receiving multiple  
109 loading doses; diagnosed with amyotrophic lateral sclerosis (ALS); and missing data on  
110 gender, age, BW, body mass index (BMI), or serum creatinine.

111 Thirteen patients received two courses of vancomycin treatment with pharmacist-designed  
112 initial dosing regimens. In this group, each regimen was independently designed based on  
113 patient characteristics at start of vancomycin treatment, and therefore we included each of



114 these patients as two cases in the study dataset.

115

## 116 **Building of the ML model**

117

118 The dataset used in this study included clinical and routine laboratory data, initial dosing  
119 regimens, and serum vancomycin concentrations at initial TDM (if measured). Age, gender,  
120 BW, BMI, and creatinine clearance ( $CL_{CR}$ ) calculated by the Cockcroft-Gault equation  
121 were used as parameters to predict initial dosing regimens (including loading and  
122 maintenance doses), because we routinely estimated individualized dosing regimens based  
123 on these data, as recommended by previous studies (10, 16). The dataset ( $n = 106$ ) was  
124 divided into training and testing datasets in a ratio of 84:22 (approximately 80:20).

125 We developed an ML model by applying random forest (RF) classification to the dataset  
126 (see the schematic diagram in Fig. 1). An RF is an ensemble of classification (decision)  
127 trees that are generated by sampling data and features in the training dataset (17).  
128 Prediction is based on a simple majority vote by decision trees. A hyperparameter is a  
129 parameter that affects how well a model is trained, and it therefore controls the model  
130 performance. In the RF technique, hyperparameters include the number of decision trees

131 (n\_estimator) and the maximum depth of the trees (max\_depth) (18).

132 K-fold cross-validation was applied on RF classification to select the most appropriate

133 value of each hyperparameter (n\_estimator and max\_depth) (19). In this process, the dataset

134 of a training group was further divided into two groups, a training-validation set and a

135 testing-validation set, in the ratio of 67:17 (approximately 80:20) using the five-fold

136 cross-validation method (Fig. 2). The models were then built, and the accuracy scores,

137 which were defined as the ratios of correct predictions to the total number of predictions,

138 were measured in each training-validation/testing-validation set, and the mean accuracy

139 score was recorded. This process was repeated with each pair of hyperparameters

140 (n\_estimator: 10, 20, 40, 80, and 160; max\_depth: 2, 4, 8, 16, and 32), resulting in

141 optimized hyperparameters that achieved the highest mean accuracy score.

142 Next, we developed the prediction model with optimized hyperparameters. Feature

143 importance, which represents relative importance in terms of the accuracy of the model,

144 was estimated during training phase (18).

145 Lastly, we evaluated the performance of the predictive model on the testing data. Accuracy

146 scores for loading doses and maintenance doses were used to evaluate the model.

147

148 **Estimation of trough concentrations with the ML model–recommended dosing**  
149 **regimen**

150

151 Testing data that included serum vancomycin concentrations were used to estimate  
152 vancomycin trough concentrations with the ML model–recommended dosing regimen. In  
153 this analysis, we excluded cases in which dosing regimens were changed before initial  
154 TDM or in which TDM was conducted after just a single loading dose. We also excluded  
155 patients who developed vancomycin-associated acute kidney injury (AKI), which was  
156 defined as an increase in the serum creatine level of 0.5 mg/dL or a 50% increase from  
157 baseline in at least two consecutive measurements, as is consistent with other studies of  
158 vancomycin TDM (20, 21). The trough concentration with the ML model–recommended  
159 regimen was estimated using the following equation:

160

Estimated concentration

$$= \text{Actual concentration} \times \frac{\text{Daily maintenance dose with model regimen}}{\text{Daily maintenance dose with expert regimen}}$$

161

162 Comparison between the current ML model and the previous ML model reported by Imai

163 and colleagues was performed in patients with a BW  $\geq$  40 kg and an estimated glomerular  
164 filtration rate (eGFR)  $\geq$  50 mL/min, because the latter model was validated in this  
165 population (6).

166

### 167 **Statistical analysis**

168

169 We used the Mann-Whitney test for continuous data, and Fisher's exact test or the  
170 chi-square test for categorical data. All statistical tests were two-tailed, and p values of less  
171 than 0.05 were considered statistically significant except in multiple testing (Table 5),  
172 where significance was adjusted by Bonferroni correction. Statistical analyses were  
173 performed using the Python statistics module.

174

### 175 **Ethics**

176

177 This study was approved by the ethics committee of Nagoya University Hospital (Approval  
178 No. 2021-0189).

179 **Results**

180

181 **Patient characteristics**

182

183 During the study period, there were 140 cases in 127 patients, with cases defined as  
184 instances in which initial dosing regimens of vancomycin were determined by TDM experts.  
185 Of these, 16 cases were in patients under 18 years of age, 14 were in patients undergoing  
186 peritoneal dialysis or hemodialysis, and two were in patients who received multiple loading  
187 doses; all of these cases were excluded from this study. One patient whose BMI value was  
188 missing and one patient with ALS were also excluded. The remaining 106 cases in 97  
189 patients were included.

190 The target attainment rate at initial TDM was 71.1% in the total population, which was  
191 comparable to the rates reported in another study of expert (pharmacist)-managed  
192 vancomycin TDM (64.3%) (12), thus validating our initial dose planning (Table 1). Eligible  
193 cases were randomly assigned to a training group and a testing group in the ratio of 84:22  
194 (approximately 80:20). Overall, patient characteristics in the training and testing groups  
195 were well balanced (Table 1).

196

## 197 **Building an ML model to determine the initial vancomycin dose**

198

199 Next, we sought to build an ML model for predicting individually tailored vancomycin  
200 dosing regimens to achieve the therapeutic window. To this end, we first optimized the  
201 hyperparameters for RF classification, then built a predictive model with optimized  
202 hyperparameters (Fig. 2). Individual features were ranked based on their relative  
203 importance to the accuracy of the model. For loading doses, BW was ranked as the most  
204 important feature, followed by  $CL_{CR}$ , BMI, age, and gender, while for maintenance doses,  
205  $CL_{CR}$  was the most important feature, followed by BW, BMI, age, and gender (Fig. 3).

206

## 207 **ML model evaluation**

208

209 Next, we examined whether the ML model generated the same dosing regimen as TDM  
210 experts. Table 2 summarizes the performance of the model on the testing dataset. The  
211 accuracy scores for loading and maintenance doses were both 63.6% (Table 3). For loading  
212 doses, the differences in doses between the expert- and ML model–recommended regimens

213 fell within the range of 50–150%. For maintenance doses, there were two cases in which  
214 the differences in doses were larger than two-fold (cases no. 6 and no. 18). The rate of  
215 achieving a therapeutic window with ML model–recommended regimens was estimated to  
216 be 73.3%, which was comparable to that with expert-recommended regimens (80.0%,  $p =$   
217 1.0; Tables 2 and 4).

218 Lastly, we compared the target attainment rates of our predictive ML model and the ML  
219 model developed by Imai and colleagues (6). Because the latter model was validated in  
220 patients with a  $BW \geq 40$  kg and  $eGFR \geq 50$  mL/min, we compared cases that met these  
221 criteria. In this group, the target attainment rates of the expert- and ML model–  
222 recommended regimens were 83.3% and 75.0%, respectively, again with no significant  
223 difference ( $p = 1.0$ ; Tables 2 and 5). Importantly, the target attainment rate of regimens  
224 recommended by the previous ML model was much lower, at only 33.3%; this indicates the  
225 poor ability of that model to predict appropriate dosing regimens, at least using the current  
226 testing dataset. However, it should be noted that the differences in target attainment rates  
227 compared to our expert- and ML model–recommended regimens did not reach statistical  
228 significance ( $p = 0.0361$  and  $0.0995$ , respectively. Note that significance was set at  $0.0167$   
229 after Bonferroni correction).

230 **Discussion**

231

232 Although considerable effort has been made to develop population-specific dosing  
233 nomograms for vancomycin, strategies to determine individually optimized initial dosing  
234 regimens remain controversial. In practice, decision making about initial dose planning  
235 depends on each clinician's experience regarding the clinical assessment of renal function  
236 and the determination of which dosing nomograms to use.

237 Here, we sought to build an ML model that emulates experts' decision making concerning  
238 initial vancomycin dosing. Toward this end, subjects were limited to those who received an  
239 initial dosing regimen defined by TDM experts. In contrast with the previous study of Imai  
240 et al. (6), we did not exclude patients with a low BW (< 40 kg) or renal dysfunction (eGFR  
241 < 50 mL/min) due to the prevalence of such patients and our desire to assess the robustness  
242 of the model to changes in patient characteristics.

243 Feature importance was largely consistent with predictive covariates conventionally used to  
244 determine appropriate dosing regimens: BW and  $CL_{CR}$  were the most important features for  
245 loading and maintenance doses, respectively (10, 22). Although loading doses are generally  
246 determined based on actual BW, our results indicate that  $CL_{CR}$  is also a key feature for



247 predicting loading dose (23). This reflects adjustment of loading doses based on renal  
248 function, which has been proposed in recent studies (7, 10).

249 Our ML model scored 63.6% in testing accuracy for both loading and maintenance doses.  
250 These modest accuracy scores may have been due to the difficulty of multi-class  
251 classification tasks (24); in the current dataset (n = 106), there were six and nine classes  
252 (doses) of loading and maintenance doses, respectively (data not shown). In addition, the  
253 fact that this study had a relatively small dataset (n = 106), which generally leads to  
254 overfitting, may have further contributed to a decrease in predictive accuracy (25).

255 The target attainment rates were similar for our expert- and ML model–recommended  
256 regimens (80.0% and 73.3%, respectively; Table 4). This result indicates that our ML model  
257 can competently predict individually tailored vancomycin dosing regimens and thus  
258 achieve a therapeutic window. Importantly, the target attainment rate of the ML model  
259 developed by Imai et al. was 33.3% (6), which is much lower than that of our model (Table  
260 5). This implies that our model has better predictability, but due to the small sample sizes in  
261 this study, the differences in target attainment rates between the two models did not reach  
262 statistical significance (p = 0.0995). The discrepant predictive accuracy of the two models  
263 is largely attributed to the differences in the training datasets. Differences in ML algorithms

264 also likely played a role; the decision tree algorithm used in Imai et al. is a classification  
265 tree (a nomogram), which is easy to comprehend but is more susceptible to overfitting than  
266 the RF algorithm used in the present study (6, 17).

267 The limitations of this study are as follows. First, TDM results were lacking in many study  
268 subjects due to the discontinuation of vancomycin treatment before TDM (mainly due to  
269 de-escalation). This hindered the evaluation of ML model–recommended dosing regimens  
270 regarding their ability to achieve therapeutic levels. Second, the majority of study subjects  
271 were older adults, which may have influenced the model’s predictive performance in  
272 younger people. Third, our ML model was derived from a single-center, observational study,  
273 potentially limiting external generalizability. In addition, it should be noted that the above  
274 results are at least partially dependent on the current testing dataset, and thus further  
275 evaluation in other populations is required. Lastly and most importantly, the dosing  
276 regimens recorded in the dataset were designed to achieve target trough concentrations  
277 rather than target AUC/MIC values, raising the concern that our model tends to predict  
278 trough-guided dosing (that is, adjusting doses by considering trough concentrations only).  
279 This is thought to increase the occurrence of vancomycin-associated AKI compared to  
280 AUC-guided dosing, and recently published guidelines do not recommend this approach in

281 patients with serious, invasive MRSA infections (1, 26). A dataset of AUC-guided dosing  
282 regimens is needed to build a prediction model for AUC-guided dosing.  
283 Collectively, we developed a novel ML model to predict individually tailored vancomycin  
284 initial dosing regimens, and this model had a high rate of achieving therapeutic  
285 concentration windows. Our predictive model will aid decision making for initial  
286 vancomycin dosing and contribute to early attainment of a therapeutic range, which is  
287 crucial for clinical and microbiological success in treating serious infections due to MRSA.

288 **Acknowledgments**

289

290 This work was supported by JSPS KAKENHI (Grant Numbers JP 20H03428 and

291 JP19H03532).

292

293 **Conflicts of Interest**

294

295 The authors declare no conflicts of interests.

296 **References**

297

- 298 1. Rybak MJ, Le J, Lodise TP, Levine DP, Bradley JS, Liu C, Mueller BA, Pai MP,  
299 Wong-Beringer A, Rotschafer JC, Rodvold KA, Maples HD, Lomaestro BM. 2020.  
300 Therapeutic monitoring of vancomycin for serious methicillin-resistant  
301 Staphylococcus aureus infections: A revised consensus guideline and review by the  
302 American Society of Health-System Pharmacists, the Infectious Diseases Society of  
303 America, the *Pediatr. Am J Heal Pharm.* Oxford University Press.
- 304 2. Suzuki Y, Kawasaki K, Sato Y, Tokimatsu I, Itoh H, Hiramatsu K, Takeyama M,  
305 Kadota JI. 2012. Is peak concentration needed in therapeutic drug monitoring of  
306 vancomycin? a pharmacokinetic-pharmacodynamic analysis in patients with  
307 methicillin-resistant staphylococcus aureus pneumonia. *Chemotherapy* 58:308–312.
- 308 3. Sakoulas G, Gold HS, Cohen RA, Venkataraman L, Moellering RC, Eliopoulos GM.  
309 2006. Effects of prolonged vancomycin administration on methicillin-resistant  
310 Staphylococcus aureus (MRSA) in a patient with recurrent bacteraemia. *J*  
311 *Antimicrob Chemother* 57:699–704.
- 312 4. Rybak M, Lomaestro B, Rotschafer JC, Moellering R, Craig W, Billeter M,

- 313 Dalovisio JR, Levine DP, Reilly C. 2009. Therapeutic monitoring of vancomycin in  
314 adult patients: A consensus review of the American Society of Health-System  
315 Pharmacists, the Infectious Diseases Society of America, and the Society of  
316 Infectious Diseases Pharmacists. *Am J Heal Pharm. American Society of*  
317 *Health-Systems Pharmacy.*
- 318 5. 2005. Guidelines for the management of adults with hospital-acquired,  
319 ventilator-associated, and healthcare-associated pneumonia. *Am J Respir Crit Care*  
320 *Med.*
- 321 6. Imai S, Takekuma Y, Miyai T, Sugawara M. 2020. A new algorithm optimized for  
322 initial dose settings of vancomycin using machine learning. *Biol Pharm Bull* 43:188–  
323 193.
- 324 7. Oda K, Katanoda T, Hashiguchi Y, Kondo S, Narita Y, Iwamura K, Nosaka K, Jono  
325 H, Saito H. 2020. Development and evaluation of a vancomycin dosing nomogram  
326 to achieve the target area under the concentration-time curve. A retrospective study.  
327 *J Infect Chemother* 26:444–450.
- 328 8. Marqués-Miñana MR, Saadeddin A, Peris JE. 2010. Population pharmacokinetic  
329 analysis of vancomycin in neonates. A new proposal of initial dosage guideline. *Br J*

- 330 Clin Pharmacol 70:713–720.
- 331 9. Thalakada R, Legal M, Lau TTY, Luey T, Batterink J, Ensom MHH. 2012.
- 332 Development and validation of a novel vancomycin dosing nomogram for achieving
- 333 high-target trough levels at 2 Canadian teaching hospitals. *Can J Hosp Pharm*
- 334 65:180–187.
- 335 10. Broeker A, Nardecchia M, Klinker KP, Derendorf H, Day RO, Marriott DJ, Carland
- 336 JE, Stocker SL, Wicha SG. 2019. Towards precision dosing of vancomycin: a
- 337 systematic evaluation of pharmacometric models for Bayesian forecasting. *Clin*
- 338 *Microbiol Infect* 25:1286.e1-1286.e7.
- 339 11. Kufel WD, Seabury RW, Mogle BT, Beccari M V., Probst LA, Steele JM. 2019.
- 340 Readiness to implement vancomycin monitoring based on area under the
- 341 concentration-time curve: A cross-sectional survey of a national health consortium.
- 342 *Am J Heal Pharm* 76:889–894.
- 343 12. Komoto A, Maiguma T, Teshima D, Sugiyama T, Haruki Y. 2018. Effects of
- 344 pharmacist intervention in Vancomycin treatment for patients with bacteremia due to
- 345 Methicillin-resistant *Staphylococcus aureus*. *PLoS One* 13.
- 346 13. Momattin H, Zogheib M, Homoud A, Al-Tawfiq JA. 2015. Safety and outcome of

- 347 pharmacy-led vancomycin dosing and monitoring. *Chemotherapy* 61:3–7.
- 348 14. Shah P, Kendall F, Khozin S, Goosen R, Hu J, Laramie J, Ringel M, Schork N. 2019.
- 349 Artificial intelligence and machine learning in clinical development: a translational
- 350 perspective. *npj Digit Med* 2.
- 351 15. Huang X, Yu Z, Wei X, Shi J, Wang Y, Wang Z, Chen J, Bu S, Li L, Gao F, Zhang J,
- 352 Xu A. 2021. Prediction of vancomycin dose on high-dimensional data using machine
- 353 learning techniques. *Expert Rev Clin Pharmacol* 1–11.
- 354 16. Crass RL, Dunn R, Hong J, Krop LC, Pai MP. 2018. Dosing vancomycin in the
- 355 super obese: Less is more. *J Antimicrob Chemother*. Oxford University Press.
- 356 17. Pavlov YL. 2001. Random forests. *Mach Learn* 45:5–32.
- 357 18. Probst P, Boulesteix AL, Bischl B. 2019. Tunability: Importance of hyperparameters
- 358 of machine learning algorithms. *J Mach Learn Res* 20:1–32.
- 359 19. Kohavi R. 1995. A Study of Cross-Validation and Bootstrap for Accuracy
- 360 Estimation and Model Selection. *Proc 14th Int Jt Conf Artif Intell* 338–345.
- 361 20. Lodise TP, Lomaestro B, Graves J, Drusano GL. 2008. Larger vancomycin doses (at
- 362 least four grams per day) are associated with an increased incidence of
- 363 nephrotoxicity. *Antimicrob Agents Chemother* 52:1330–1336.



- 364 21. Neely MN, Kato L, Youn G, Kraler L, Bayard D, Van Guilder M, Schumitzky A,  
365 Yamada W, Jones B, Minejima E. 2018. Prospective trial on the use of trough  
366 concentration versus area under the curve to determine therapeutic vancomycin  
367 dosing. *Antimicrob Agents Chemother* 62.
- 368 22. Vandecasteele SJ, De Vriese AS. 2010. Recent changes in vancomycin use in renal  
369 failure. *Kidney Int*.
- 370 23. Li J, Udy AA, Kirkpatrick CMJ, Lipman J, Roberts JA. 2012. Improving  
371 vancomycin prescription in critical illness through a drug use evaluation process: A  
372 weight-based dosing intervention study. *Int J Antimicrob Agents* 39:69–72.
- 373 24. Sebban M, Nock R, Chauchat JH, Rakotomalala R. 2000. Impact of Learning Set  
374 Quality and Size. *Int J Comput Syst Signal* 1:85–105.
- 375 25. D'souza RN, Huang PY, Yeh FC. 2020. Structural Analysis and Optimization of  
376 Convolutional Neural Networks with a Small Sample Size. *Sci Rep* 10.
- 377 26. Oda K, Jono H, Nosaka K, Saito H. 2020. Reduced nephrotoxicity with vancomycin  
378 therapeutic drug monitoring guided by area under the concentration–time curve  
379 against a trough 15–20 µg/mL concentration. *Int J Antimicrob Agents* 56.



382 **Figure legends**

383

384 **Fig. 1** Schematic diagram of RF classification. (A) Training samples and features are  
385 randomly sampled; then, classification (decision) trees are constructed with each set of  
386 samples and features. The  $n_{\text{estimator}}$  is defined as the number of trees. (B) Each decision  
387 tree classifies the test sample. The class of the test sample is predicted by majority vote (in  
388 this case, the test sample is assigned to class B)

389

390 **Fig. 2** Schematic diagram of steps in the optimization of hyperparameters. Step 1: The  
391 dataset is first split into a training set and a testing set in a ratio of 84:22. Step 2: The  
392 training set is further split into five partitions, that is, 67:17. Then four partitions and the  
393 remaining partition were used as the training and testing sets, respectively, and prediction  
394 accuracy was evaluated. The same procedure was repeated for each subset of the dataset,  
395 and the mean accuracy score was recorded. Step 3: Step 2 was repeated with different sets  
396 of hyperparameters ( $n_{\text{estimators}}$  and  $\text{max\_depth}$ ), and mean accuracy scores were  
397 recorded in each iteration. The set of hyperparameters with the highest mean accuracy  
398 scores in Step 2 was obtained as the optimized parameters and used for model construction.

399

400 **Fig. 3** Feature importance in the ML-based prediction model.

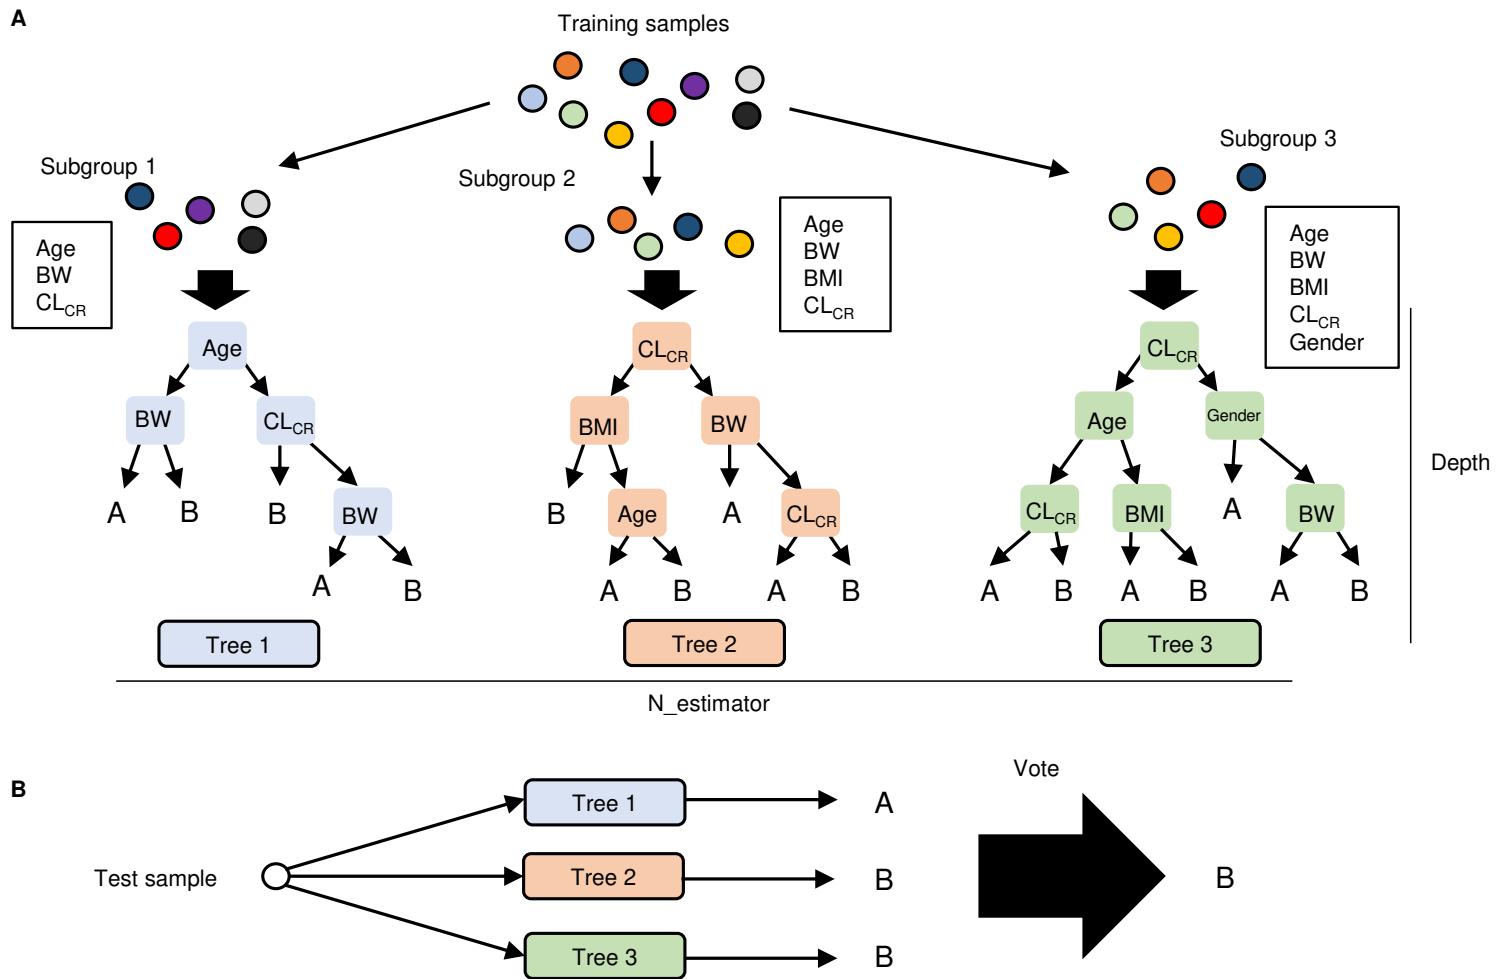

**Fig. 1** Schematic diagram of RF classification. (A) Training samples and features are randomly sampled; then, classification (decision) trees are constructed with each set of samples and features. The `n_estimator` is defined as the number of trees. (B) Each decision tree classifies the test sample. The class of the test sample is predicted by majority vote (in this case, the test sample is assigned to class B)

Step 1. Splitting the dataset

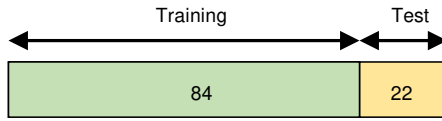

Step 2. Cross-validation

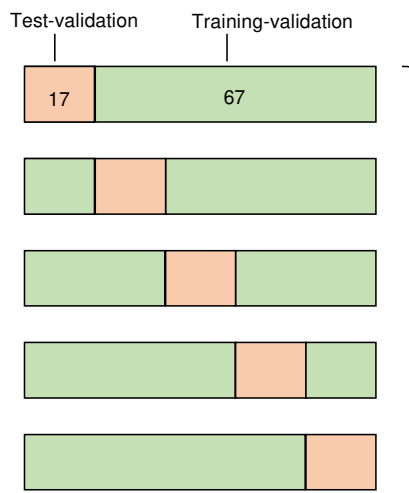

Step 3. Optimization of hyperparameters

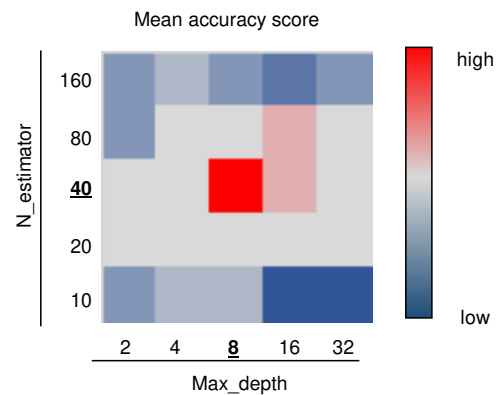

In this case, `n_estimator = 40` and `max_depth = 8` are the optimized hyperparameters.

**Fig. 2** Schematic diagram of steps in the optimization of hyperparameters. Step 1: The dataset is first split into a training set and a testing set in a ratio of 84:22. Step 2: The training set is further split into five partitions, that is, 67:17. Then four partitions and the remaining partition were used as the training and testing sets, respectively, and prediction accuracy was evaluated. The same procedure was repeated for each subset of the dataset, and the mean accuracy score was recorded. Step 3: Step 2 was repeated with different sets of hyperparameters (`n_estimators` and `max_depth`), and mean accuracy scores were recorded in each iteration. The set of hyperparameters with the highest mean accuracy scores in Step 2 was obtained as the optimized parameters and used for model construction.

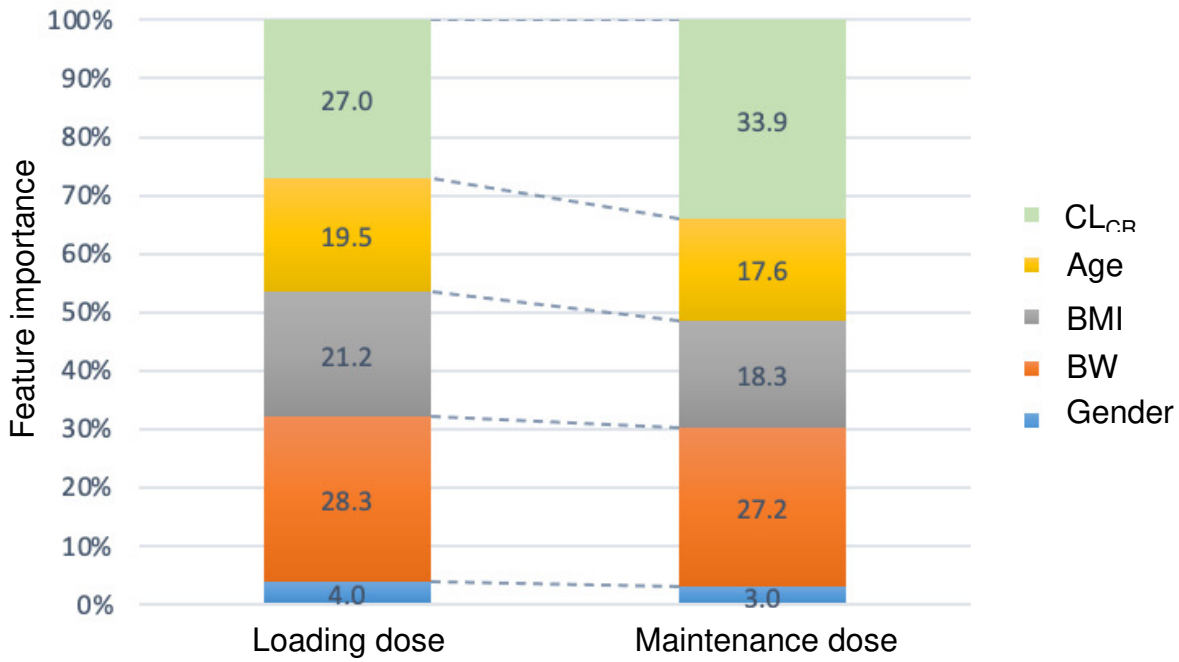

**Fig. 3** Feature importance in the ML-based prediction model.

**TABLE 1** Clinical characteristics of the study subjects

| Characteristics                                          | Total population<br>(n = 106) | Training group<br>(n = 84) | Testing group<br>(n = 22) | P value<br>(training vs<br>testing) |
|----------------------------------------------------------|-------------------------------|----------------------------|---------------------------|-------------------------------------|
| Age (year) [median (IQR)]                                | 70.0 (20.3)                   | 68.5 (21.5)                | 73.0 (15.8)               | 0.227 <sup>a</sup>                  |
| Gender                                                   |                               |                            |                           |                                     |
| Male [n (%)]                                             | 69 (65.1)                     | 57 (67.9)                  | 12 (54.5)                 | 0.244 <sup>b</sup>                  |
| Female [n (%)]                                           | 37 (34.9)                     | 27 (32.1)                  | 10 (45.5)                 |                                     |
| BW (kg) [mean ± SD]                                      | 56.3 ± 13.8                   | 55.8 ± 13.9                | 58.3 ± 13.5               | 0.391 <sup>a</sup>                  |
| BMI [mean ± SD]                                          | 21.6 ± 5.1                    | 21.2 ± 4.7                 | 23.1 ± 6.2                | 0.160 <sup>a</sup>                  |
| CL <sub>CR</sub> (mL/min) [mean ± SD]                    | 85.5 ± 59.2                   | 88.5 ± 63.5                | 74.1 ± 37.8               | 0.654 <sup>a</sup>                  |
| Target attainment at initial TDM<br>[achieved/total (%)] | 54/76 (71.1%)                 | 42/61 (68.9%)              | 12/15 (80.0%)             | 0.532 <sup>c</sup>                  |

Abbreviations: IQR, interquartile range; BW, body weight; SD, standard deviation; BMI, body mass index; CL<sub>CR</sub>, creatinine clearance; TDM, therapeutic drug monitoring.

<sup>a</sup>Mann-Whitney U test, <sup>b</sup>Chi-square test, <sup>c</sup>Fisher's exact test



**TABLE 2** Model-recommended dosing regimens and estimated trough concentrations in the testing dataset

| Case no. | Gender | BW (kg) | BMI  | Age (year) | CL <sub>CR</sub> (mL/min) | eGFR (mL/min) | Loading dose (mg) |                  | Maintenance dose |                           |                                                     | Trough concentration (mg/L)   |                               |                                  | AKI |
|----------|--------|---------|------|------------|---------------------------|---------------|-------------------|------------------|------------------|---------------------------|-----------------------------------------------------|-------------------------------|-------------------------------|----------------------------------|-----|
|          |        |         |      |            |                           |               | Expert            | Current ML model | Expert (mg/day)  | Current ML model (mg/day) | Previous ML model [mg/day (mg/kg/day)] <sup>a</sup> | Expert (actual concentration) | Current ML model <sup>b</sup> | Previous ML model <sup>b,c</sup> |     |
| 1        | Male   | 46.0    | 21.3 | 76         | 60.1                      | 67.3          | 1000              | 1000             | 1500             | 1500                      | 1297 (28.2)                                         | 10.77                         | 10.77                         | 9.31                             | No  |
| 2        | Female | 52.6    | 20.5 | 70         | 71.3                      | 64.5          | 1000              | 1500             | 2000             | 1500                      | 1483 (28.2)                                         | 12.76                         | 9.57                          | 9.46                             | No  |
| 3        | Female | 62.0    | 26.0 | 77         | 69.9                      | 60.2          | 1500              | 1000             | 2000             | 2000                      | 1748 (28.2)                                         | 11.92                         | 11.92                         | 10.42                            | No  |
| 4        | Male   | 58.3    | 20.0 | 38         | 103.2                     | 84.7          | 1250              | 1500             | 2000             | 2000                      | ND                                                  | NA                            | ND                            | ND                               | No  |
| 5        | Female | 49.3    | 24.7 | 88         | 32.9                      | 34.2          | 1000              | 1000             | 500              | 500                       | ND                                                  | NA                            | ND                            | ND                               | No  |
| 6        | Male   | 54.2    | 20.7 | 82         | 21.4                      | 22.7          | 1000              | 1000             | 500              | 1000                      | ND                                                  | 19.80                         | ND                            | ND                               | AKI |
| 7        | Male   | 58.9    | 22.2 | 80         | 75.4                      | 83.2          | 1000              | 1500             | 2000             | 2000                      | 1630 (27.7)                                         | 11.70                         | 11.70                         | 9.54                             | No  |
| 8        | Male   | 47.5    | 16.4 | 78         | 56.0                      | 69.7          | 1000              | 1000             | 1000             | 1000                      | 1340 (28.2)                                         | 19.00                         | 19.00                         | 25.45                            | No  |
| 9        | Male   | 58.8    | 22.5 | 82         | 20.3                      | 20.3          | 1000              | 1000             | 400              | 500                       | ND                                                  | NA                            | ND                            | ND                               | No  |
| 10       | Female | 48.3    | 19.7 | 79         | 30.5                      | 29.8          | 1000              | 1000             | 750              | 750                       | ND                                                  | 16.91                         | 16.91                         | ND                               | No  |
| 11       | Male   | 65.2    | 21.4 | 65         | 97.0                      | 89.5          | 1500              | 1500             | 2000             | 2000                      | ND                                                  | NA                            | ND                            | ND                               | No  |
| 12       | Male   | 69.5    | 24.5 | 71         | 96.5                      | 88.7          | 1500              | 1500             | 2000             | 2000                      | 2537 (36.5)                                         | 7.19                          | 7.19                          | 9.12                             | No  |
| 13       | Male   | 55.7    | 21.4 | 47         | 71.2                      | 58.1          | 1500              | 1500             | 2000             | 1500                      | ND                                                  | NA                            | ND                            | ND                               | No  |
| 14       | Female | 103.0   | 46.4 | 43         | 190.2                     | 92.1          | 2000              | 2000             | 3000             | 2000                      | 3729 (36.2)                                         | 17.60                         | 11.73                         | 21.87                            | No  |
| 15       | Female | 71.0    | 29.2 | 72         | 74.0                      | 55.3          | 1000              | 1000             | 2000             | 2000                      | 1420 (20.0)                                         | 15.42                         | 15.42                         | 10.95                            | No  |
| 16       | Male   | 66.0    | 23.7 | 74         | 68.0                      | 64.5          | 1500              | 1000             | 2000             | 2000                      | 1861 (28.2)                                         | 13.52                         | 13.52                         | 12.58                            | No  |
| 17       | Female | 37.1    | 17.2 | 75         | 73.0                      | 83.6          | 1000              | 1000             | 1500             | 1500                      | ND                                                  | 16.37                         | 16.37                         | ND                               | No  |
| 18       | Female | 45.5    | 17.1 | 63         | 137.9                     | 137.7         | 1000              | 1250             | 750              | 1500                      | ND                                                  | NA                            | ND                            | ND                               | No  |
| 19       | Female | 63.5    | 26.1 | 61         | 56.4                      | 39.4          | 1500              | 1000             | 1500             | 2000                      | ND                                                  | 25.27                         | 33.69                         | ND                               | No  |
| 20       | Male   | 48.2    | 18.8 | 68         | 68.9                      | 72.9          | 1250              | 750              | 2000             | 1500                      | 1759 (36.5)                                         | 13.70                         | 10.28                         | 12.05                            | No  |
| 21       | Female | 70.3    | 28.1 | 46         | 90.7                      | 56.1          | 1500              | 1500             | 2000             | 2000                      | 1863 (26.5)                                         | 33.00                         | 33.00                         | 30.74                            | No  |
| 22       | Male   | 51.0    | 19.4 | 77         | 65.6                      | 75.1          | 1000              | 1000             | 1500             | 1500                      | 1413 (27.7)                                         | 10.03                         | 10.03                         | 9.45                             | No  |

Abbreviations: BW, body weight; BMI, body mass index; CL<sub>CR</sub>, creatinine clearance; eGFR, estimated glomerular filtration rate; ML, machine learning; ND, data not determined; NA, data not available; AKI, acute kidney injury.

<sup>a</sup>Dose per body weight (mg/kg/day) is also described, because a previous ML model predicted doses in this format.

<sup>b</sup>Concentrations were not determined if patients developed AKI before TDM.

<sup>c</sup>Patients with a BW ≥ 40 kg and an eGFR ≥ 50 mL/min were included.

**TABLE 3** Relative ML-recommended doses

| Ratio of ML- to expert-recommended dose | Loading dose<br>(n = 22) | Maintenance dose<br>(n = 22) |
|-----------------------------------------|--------------------------|------------------------------|
| > 150% [n (%)]                          | 0 (0.0)                  | 2 (9.1)                      |
| > 125% and ≤ 150% [n (%)]               | 2 (9.1)                  | 1 (4.5)                      |
| > 100% and ≤ 125% [n (%)]               | 2 (9.1)                  | 1 (4.5)                      |
| 100% (identical)                        | 14 (63.6)                | 14 (63.6)                    |
| ≥ 75% and < 100% [n (%)]                | 0 (0.0)                  | 3 (13.6)                     |
| ≥ 50% and < 75% [n (%)]                 | 4 (18.2)                 | 1 (4.5)                      |
| < 50% [n (%)]                           | 0 (0.0)                  | 0 (0.0)                      |

Abbreviation: ML, machine learning.

**TABLE 4** Rates of achieving targeted trough levels with the expert- and current ML model–driven dosing regimens

| Trough concentration | Expert<br>(n = 15) | Current ML model<br>(n = 15) | P value<br>(Fisher's exact test) |
|----------------------|--------------------|------------------------------|----------------------------------|
| < 10 mg/L [n (%)]    | 1 (6.7)            | 2 (13.3)                     | 1.0                              |
| 10–20 mg/L [n (%)]   | 12 (80.0)          | 11 (73.3)                    |                                  |
| > 20 mg/L [n (%)]    | 2 (13.3)           | 2 (13.3)                     |                                  |

Abbreviation: ML, machine learning.

**TABLE 5** Rates of achieving targeted trough levels with the current and previous ML model–driven dosing regimens

| Trough concentration                                   | Expert<br>(n = 12) | Current ML model<br>(n = 12) | Previous ML model *<br>(n = 12) |
|--------------------------------------------------------|--------------------|------------------------------|---------------------------------|
| < 10 mg/L [n (%)]                                      | 1 (8.3)            | 2 (16.7)                     | 5 (41.7)                        |
| 10–20 mg/L [n (%)]                                     | 10 (83.3)          | 9 (75.0)                     | 4 (33.3)                        |
| > 20 mg/L [n (%)]                                      | 1 (8.3)            | 1 (8.3)                      | 3 (25.0)                        |
| P value (Fisher's exact test, vs. expert)              |                    | 1.0                          | 0.0361                          |
| P value (Fisher's exact test, current vs. previous ML) |                    |                              | 0.0995                          |

Abbreviation: ML, machine learning.

\* Imai S et al. 2020 (6)
